# Supplementary material for: Rapid discrimination of strain-dependent fermentation characteristics among Lactobacillus strains by NMR-based metabolomics of fermented vegetable juice
Source: PLOS journal article supplement (doi:10.1371/journal.pone.0182229), 2017-07-31

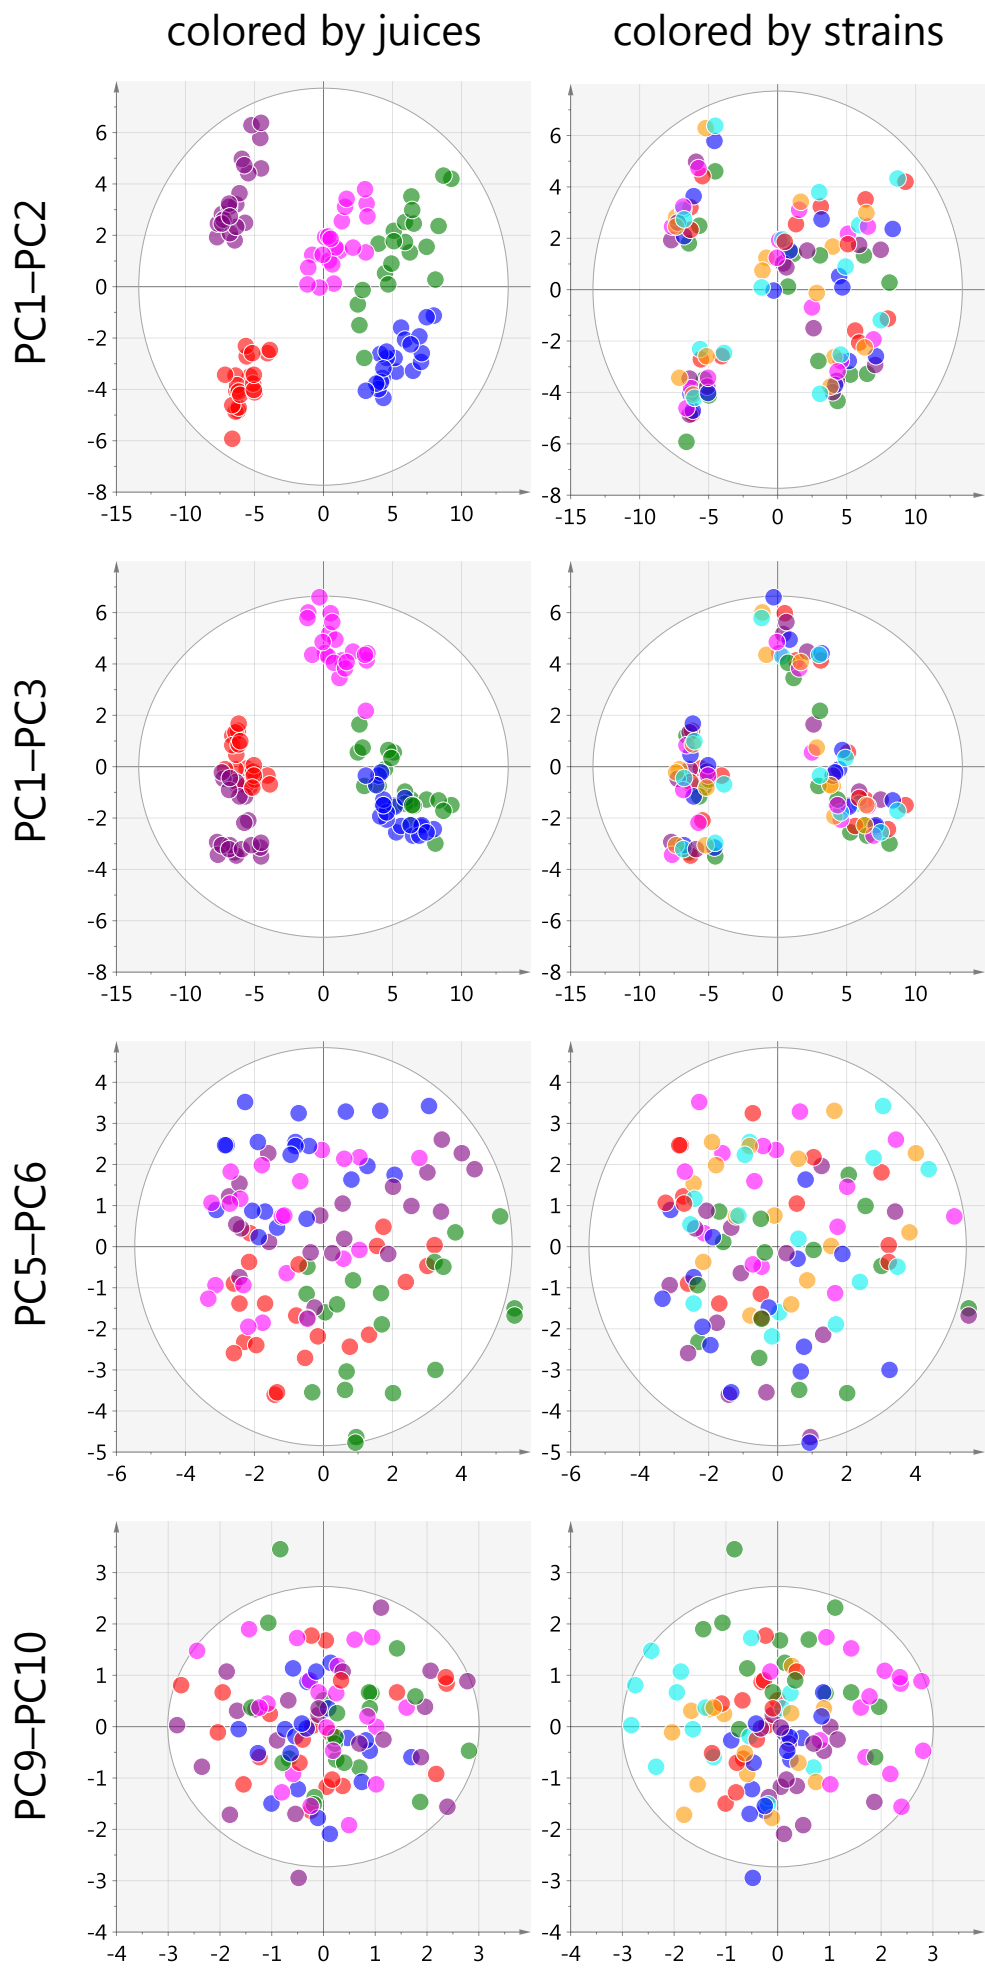

Supplement: S3 (10.1371/journal.pone.0182229.s003) [file journal.pone.0182229.s003]
